# Supplementary material
Source: MDPI journal article supplement (https://www.mdpi.com/2673-8112/3/3/24)
Supplement: s1 [file s1]

## English Questionnaire

**Title: Coping with COVID-19 Pandemic: A population Based Study in Bangladesh**

| <b>Participant Identification</b>       |                    |                                                                                                                                                     |
|-----------------------------------------|--------------------|-----------------------------------------------------------------------------------------------------------------------------------------------------|
| Date of interview:                      |                    |                                                                                                                                                     |
| Participant name:                       |                    |                                                                                                                                                     |
| Address:      Dist.:                    |                    | Division:                                                                                                                                           |
| Verbal consent taken:                   |                    | Yes                          No                                                                                                                     |
| <b>1. Socio-demographic information</b> |                    |                                                                                                                                                     |
| 1.1                                     | Age                | ..... years                                                                                                                                         |
| 1.2                                     | Gender             | 1= Male<br>2=Female                                                                                                                                 |
| 1.3                                     | Marital status     | 1=Single<br>2=Married<br>3= Divorcee<br>4= Widow/widower                                                                                            |
| 1.4                                     | Educational status | 1= No formal education<br>2=Primary education<br>3=Secondary education<br>4=Higher secondary<br>5=Under Graduate<br>6=Post Graduate<br>7=PhD/Others |
| 1.5                                     | Occupation:        | 1= Government job<br>2= Private job<br>3= Student<br>4= Farmer<br>5= Business<br>6= Housewife<br>7= Unemployed<br>8= Retired                        |

|      |                                                                                                                                                         |                                                                                                                                                                                                    |
|------|---------------------------------------------------------------------------------------------------------------------------------------------------------|----------------------------------------------------------------------------------------------------------------------------------------------------------------------------------------------------|
|      |                                                                                                                                                         | 9= Others (specify.....)                                                                                                                                                                           |
| 1.6  | Living area                                                                                                                                             | 1= Rural<br>2= Urban                                                                                                                                                                               |
| 1.7  | Number of family members                                                                                                                                |                                                                                                                                                                                                    |
| 1.8  | Have you ever been tested for COVID-19?                                                                                                                 | 1. Yes<br>2. No<br>If yes, when & what was the outcome?<br>.....                                                                                                                                   |
| 1.9  | Do you have any experiences of COVID-19 like symptoms till March, 2020 to now?                                                                          | 1. Yes<br>2. No<br>If yes what symptoms? .....                                                                                                                                                     |
| 1.10 | If you have experienced COVID-19 symptoms, then what did you do?<br>If you have not experienced COVID-19 symptoms – please enter – Not applicable (N/A) | 1. Visited doctor in outdoor<br>2. Arranged for admission into Hospital<br>3. Took medicine myself or from pharmacy<br>4. Followed health advice rested at home<br>5. Others..... (please explain) |
| 1.11 | Do you know of anyone else who diagnosed COVID-19 positive around you? eg. Family members/ neighbors/ colleagues?                                       | 1=Yes<br>2=No                                                                                                                                                                                      |
| 1.12 | What is your monthly Individual (I) & Family (F) income in BDT – if willing to disclose                                                                 | 1. Individual ..... taka<br>2. Family ..... taka                                                                                                                                                   |
| 1.13 | Estimated amount of Monthly Individual (I) & Family (F) income in BDT potentially affected/reduced during the COVID-19 pandemic– if willing to disclose | 1. Individual ..... taka<br>2. Family ..... taka                                                                                                                                                   |

## 2. Brief-COPE (Brief-COPE) Questionnaire

In this study, we are identifying the “Hardship” as the COVID-19 Pandemic. Please read over each individual statement and select the most appropriate category which best fits with your experience. This will help us to identify how much you have been using different coping styles.

|                                                                                       | I haven't been doing this at all | A little bit | A medium amount | I've been doing this a lot |
|---------------------------------------------------------------------------------------|----------------------------------|--------------|-----------------|----------------------------|
| 2.1 I've been turning to work or other activities to take my mind off things.         | 1                                | 2            | 3               | 4                          |
| 2.2 I've been concentrating my efforts on doing something about the situation I'm in. | 1                                | 2            | 3               | 4                          |
| 2.3 I've been saying to myself "this isn't real".                                     | 1                                | 2            | 3               | 4                          |
| 2.4 I've been using alcohol or other drugs to make myself feel better                 | 1                                | 2            | 3               | 4                          |
| 2.5 I've been getting emotional support from others.                                  | 1                                | 2            | 3               | 4                          |
| 2.6 I've been giving up trying to deal with it.                                       | 1                                | 2            | 3               | 4                          |
| 2.7 I've been taking action to try to make the situation better.                      | 1                                | 2            | 3               | 4                          |
| 2.8 I've been refusing to believe that it has happened.                               | 1                                | 2            | 3               | 4                          |
| 2.9 I've been saying things to let my unpleasant feelings escape.                     | 1                                | 2            | 3               | 4                          |
| 2.10 I've been getting help and advice from other people.                             | 1                                | 2            | 3               | 4                          |
| 2.11 I've been using alcohol or other drugs to help me get through it.                | 1                                | 2            | 3               | 4                          |
| 2.12 I've been trying to see it in a different light, to make it seem more positive.  | 1                                | 2            | 3               | 4                          |

|                                                                                                                                           |   |   |   |   |
|-------------------------------------------------------------------------------------------------------------------------------------------|---|---|---|---|
| 2.13 I've been criticizing myself.                                                                                                        | 1 | 2 | 3 | 4 |
| 2.14 I've been trying to come up with a strategy about what to do.                                                                        | 1 | 2 | 3 | 4 |
| 2.15 I've been getting comfort and understanding from someone.                                                                            | 1 | 2 | 3 | 4 |
| 2.16 I've been giving up the attempt to cope.                                                                                             | 1 | 2 | 3 | 4 |
| 2.17 I've been looking for something good in what is happening.                                                                           | 1 | 2 | 3 | 4 |
| 2.18 I've been making jokes about it.                                                                                                     | 1 | 2 | 3 | 4 |
| 2.19 I've been doing something to think about it less, such as going to movies, watching TV, reading, daydreaming, sleeping, or shopping. | 1 | 2 | 3 | 4 |
| 2.20 I've been accepting the reality of the fact that it has happened.                                                                    | 1 | 2 | 3 | 4 |
| 2.21 I've been expressing my negative feelings.                                                                                           | 1 | 2 | 3 | 4 |
| 2.22 I've been trying to find comfort in my religion or spiritual beliefs.                                                                | 1 | 2 | 3 | 4 |
| 2.23 I've been trying to get advice or help from other people about what                                                                  | 1 | 2 | 3 | 4 |
| 2.24 I've been learning to live with it.                                                                                                  | 1 | 2 | 3 | 4 |
| 2.25 I've been thinking hard about what steps to take.                                                                                    | 1 | 2 | 3 | 4 |
| 2.26 I've been blaming myself for things that happened                                                                                    | 1 | 2 | 3 | 4 |
| 2.27 I've been praying or meditating                                                                                                      | 1 | 2 | 3 | 4 |
| 2.28 I've been making fun of the situation.                                                                                               | 1 | 2 | 3 | 4 |
| Totals                                                                                                                                    |   |   |   |   |

## বাংলা প্রশ্নাবলী

টাইটেলঃ “কোভিড-১৯ মহামারীর সাথে মানিয়ে নেয়া: একটি জনসংখ্যা ভিত্তিক বাংলাদেশী গবেষণা”

| রোগীর সনাক্তকরণ                        |                                          |                                                                                                                                    |
|----------------------------------------|------------------------------------------|------------------------------------------------------------------------------------------------------------------------------------|
| সাক্ষাৎকারের তারিখঃ                    |                                          |                                                                                                                                    |
| অংশগ্রহণকারীর নামঃ                     |                                          |                                                                                                                                    |
| ঠিকানাঃ                                | জেলাঃ                                    | বিভাগঃ                                                                                                                             |
| মৌখিক সম্মতি নেওয়া হয়েছে:      হ্যাঁ |                                          | না                                                                                                                                 |
| পর্ব-১ আর্থ-সামাজিক জনিত তথ্যাবলী      |                                          |                                                                                                                                    |
| ১.১                                    | বয়সঃ                                    | ..... বছর                                                                                                                          |
| ১.২                                    | লিঙ্গঃ                                   | ১। পুরুষ<br>২। মহিলা                                                                                                               |
| ১.৩                                    | বৈবাহিক অবস্থা                           | ১। অবিবাহিত<br>২। বিবাহিত<br>৩। তালাকপ্রাপ্ত<br>৫। বিধবা                                                                           |
| ১.৪                                    | শিক্ষাগত যোগ্যতা                         | ১। প্রথাগত শিক্ষা নেই<br>২। প্রাথমিক<br>৩। মাধ্যমিক<br>৪। উচ্চ মাধ্যমিক<br>৫। স্নাতক<br>৬। স্নাতকোত্তর<br>৭। পিএইচডি/অন্যান্য      |
| ১.৫                                    | বর্তমান পেশা                             | ১। সরকারি চাকরি<br>২। বেসরকারি চাকরি<br>৩। ছাত্র<br>৪। কৃষি<br>৫। ব্যবসা<br>৬। গৃহিণী<br>৭। বেকার<br>৮। আবসরপ্রাপ্ত<br>৯। অন্যান্য |
| ১.৬                                    | আবাসিক এলাকা                             | ১। শহর<br>২। গ্রাম                                                                                                                 |
| ১.৭                                    | পরিবারের সদস্য সংখ্যা                    |                                                                                                                                    |
| ১.৮                                    | আপনি কি কখনো কোভিড-১৯ এর টেস্ট করেছিলেন? | ১। হ্যাঁ<br>২। না<br>যদি হ্যাঁ হয়, কবে ও তার কি ফলাফল<br>.....                                                                    |
| ১.৯                                    | আপনার কি কোভিড-১৯ এর মতো কোন উপসর্গ দেখা | ১। হ্যাঁ<br>২। না                                                                                                                  |

|      |                                                                                                                                                   |                                                                                                                                                                                                |
|------|---------------------------------------------------------------------------------------------------------------------------------------------------|------------------------------------------------------------------------------------------------------------------------------------------------------------------------------------------------|
|      | দিয়েছিলো?                                                                                                                                        | যদি হ্যাঁ হয়, কি উপসর্গ ছিলো .....                                                                                                                                                            |
| ১.১০ | আপনার কোভিড-১৯ এর মতো কোন উপসর্গ দেখা দিলে তখন আপনি কি করেছিলেন?<br>আপনার যদি কোভিড-১৯ এর মতো কোন উপসর্গ না থাকে, তাহলে লিখুন- প্রযোজ্য নয় (N/A) | ১। ডাক্তার দেখিয়েছিলাম<br>২। হাসপাতালে ভর্তি হয়েছিলাম<br>৩। নিজেই ফার্মেসী থেকে ওষুধ কিনে খেয়েছিলাম<br>৪। স্বাস্থ্য পরামর্শ মেনে বাড়িতে বিশ্রাম নিয়েছিলাম<br>৫। অন্যান্য..... বর্ণনা করুন |
| ১.১১ | আপনার আশেপাশে আত্মীয়স্বজন, বন্ধুবান্ধব বা পরিবারের কারো কি করোনা পজিটিভ এসেছিলো?                                                                 | ১। হ্যাঁ<br>২। না                                                                                                                                                                              |
| ১.১২ | আপনার নিজের ও পরিবারের মাসিক আয় কত? - যদি বলতে সমস্যা না থাকে।                                                                                   | ১। নিজের.....টাকা<br>২। পরিবারের.....টাকা                                                                                                                                                      |
| ১.১৩ | করোনা পরিস্থিতির কারণে আপনার নিজের ও পরিবারের আয় আগে থেকে আনুমানিক কি পরিমাণ কমে গিয়েছে?- যদি বলতে সমস্যা না থাকে।                              | ১। নিজের.....টাকা<br>২। পরিবারের.....টাকা                                                                                                                                                      |

## 2. Brief-COPE (Bangla Version)

**নির্দেশনাঃ** নিম্নলিখিত প্রশ্নোত্তর পর্বে আপনি কীভাবে আপনার জীবনে কষ্ট সহ্য করার চেষ্টা করেছেন তা আমরা খুঁজে বের করার চেষ্টা করবো। দয়া করে বিবৃতিগুলি পড়ুন এবং প্রতিটি মানিয়ে নেয়ার ধরন আপনি কতটা ব্যবহার করছেন তা নির্দেশ করুন।

| সংখ্যা | নির্ণায়ক                                                                                  | আমি মোটে ও এটি করছি না | সামান্য পরিমাণে করছি | মাঝারি পরিমাণে করছি | আমি এটি অনেকটাই করছি |
|--------|--------------------------------------------------------------------------------------------|------------------------|----------------------|---------------------|----------------------|
| ২.১    | আমি আমার মন থেকে বিষয়টি সরাতে কাজ বা অন্যান্য ক্রিয়াকলাপে করেছি                          | ১                      | ২                    | ৩                   | ৪                    |
| ২.২    | আমি যে পরিস্থিতির মধ্যে আছি সে সম্পর্কে কিছু করার জন্য আমার প্রচেষ্টায় মনোনিবেশ করে আসছি। | ১                      | ২                    | ৩                   | ৪                    |
| ২.৩    | আমি নিজেকে বলে আসছি "এটি বাস্তব নয়"                                                       | ১                      | ২                    | ৩                   | ৪                    |
| ২.৪    | আমার ভাল লাগার জন্য আমি অ্যালকোহল বা অন্যান্য ড্রাগ ব্যবহার করছি                           | ১                      | ২                    | ৩                   | ৪                    |
| ২.৫    | আমি অন্যের কাছ থেকে মানসিক সমর্থন পেয়ে চলেছি                                              | ১                      | ২                    | ৩                   | ৪                    |
| ২.৬    | আমি এটি মোকাবেলা করার চেষ্টা ছেড়ে দিয়েছি                                                 | ১                      | ২                    | ৩                   | ৪                    |
| ২.৭    | পরিস্থিতির উন্নতিকল্পে আমি আমার প্রচেষ্টা অব্যাহত রেখেছি                                   | ১                      | ২                    | ৩                   | ৪                    |
| ২.৮    | আমি বিশ্বাস করতে অস্বীকার করছি যে এটি ঘটেছে                                                | ১                      | ২                    | ৩                   | ৪                    |
| ২.৯    | আমি আমার অপ্রীতিকর /নিরানন্দ অনুভূতিগুলি এড়ানোর জন্য অন্যের সাথে বিভিন্ন কথা বলছি         | ১                      | ২                    | ৩                   | ৪                    |
| ২.১০   | আমি অন্য লোকদের কাছ থেকে সাহায্য এবং পরামর্শ পাচ্ছি                                        | ১                      | ২                    | ৩                   | ৪                    |
| ২.১১   | এই পরিস্থিতির মোকাবেলা করতে আমি অ্যালকোহল বা অন্যান্য ড্রাগ ব্যবহার করছি                   | ১                      | ২                    | ৩                   | ৪                    |
| ২.১২   | পরিস্থিতিটিকে আরো ইতিবাচক করার জন্য আমি তা ভিন্ন আঙ্গিকে দেখার চেষ্টা করছি                 | ১                      | ২                    | ৩                   | ৪                    |

|      |                                                                                                            |   |   |   |   |
|------|------------------------------------------------------------------------------------------------------------|---|---|---|---|
| ২.১৩ | আমি নিজেই নিজের সমালোচনা করছি                                                                              | ১ | ২ | ৩ | ৪ |
| ২.১৪ | কি করা যায় সে সম্পর্কে আমি একটা কৌশল উদ্ভাবনের চেষ্টা করছি।                                               | ১ | ২ | ৩ | ৪ |
| ২.১৫ | আমি কারও কাছ থেকে শান্তনা ও ধারণাশক্তি পাচ্ছি                                                              | ১ | ২ | ৩ | ৪ |
| ২.১৬ | আমি মানিয়ে নেয়ার চেষ্টা ছেড়ে দিয়েছি                                                                    | ১ | ২ | ৩ | ৪ |
| ২.১৭ | যা ঘটেছে তার মধ্যে আমি ভাল কিছু সন্ধান করছি                                                                | ১ | ২ | ৩ | ৪ |
| ২.১৮ | আমি এটি সম্পর্কে রসিকতা করি                                                                                | ১ | ২ | ৩ | ৪ |
| ২.১৯ | আমি এ সম্পর্কে কম চিন্তা করার জন্য মুভি ও টিভি দেখা, বই পড়া, দিবা-স্বপ্ন বিভোর, ঘুমানো বা শপিং করে যাচ্ছি | ১ | ২ | ৩ | ৪ |
| ২.২০ | যা ঘটেছে সেই বাস্তবতাকে আমি মেনে নিচ্ছি                                                                    | ১ | ২ | ৩ | ৪ |
| ২.২১ | আমি আমার নেতিবাচক অনুভূতি প্রকাশ করছি                                                                      | ১ | ২ | ৩ | ৪ |
| ২.২২ | আমি আমার ধর্ম বা আধ্যাত্মিক বিশ্বাসে সান্নাধ্য পাওয়ার চেষ্টা করছি                                         | ১ | ২ | ৩ | ৪ |
| ২.২৩ | আমি অন্যান্য লোকের কাছ থেকে এ সম্পর্কে পরামর্শ বা সহায়তা নেওয়ার চেষ্টা করছি                              | ১ | ২ | ৩ | ৪ |
| ২.২৪ | আমি এটির সাথে বাঁচতে শিখছি                                                                                 | ১ | ২ | ৩ | ৪ |
| ২.২৫ | কি পদক্ষেপ নিতে হবে তা আমি কঠোরভাবে ভাবছিলাম                                                               | ১ | ২ | ৩ | ৪ |
| ২.২৬ | যা ঘটে চলেছে তার জন্য আমি নিজেকে দোষ দিয়ে চলেছি                                                           | ১ | ২ | ৩ | ৪ |
| ২.২৭ | আমি প্রার্থনা বা ধ্যান করছি                                                                                | ১ | ২ | ৩ | ৪ |
| ২.২৮ | আমি পরিস্থিতি নিয়ে মজা করছি।                                                                              | ১ | ২ | ৩ | ৪ |
| মোট  |                                                                                                            |   |   |   |   |

“প্রশ্নপত্রটি সম্পূর্ণ করার জন্য আপনাকে ধন্যবাদ”
